# Supplementary material for: Exercise Equals the Mobilization of Visceral versus Subcutaneous Adipose Fatty Acid Molecules in Fasted Rats Associated with the Modulation of the AMPK/ATGL/HSL Axis
Source: MDPI journal article supplement (doi:10.3390/nu15143095), 2023-07-10

24:0 (Exrc\*,Fstg\*\*\*\*)

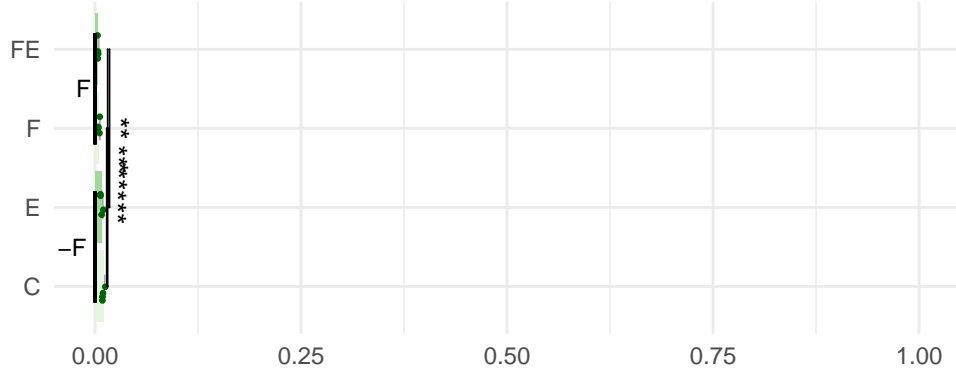

20:4 n-6 (Fstg\*\*,Fstg-Exrc\*)

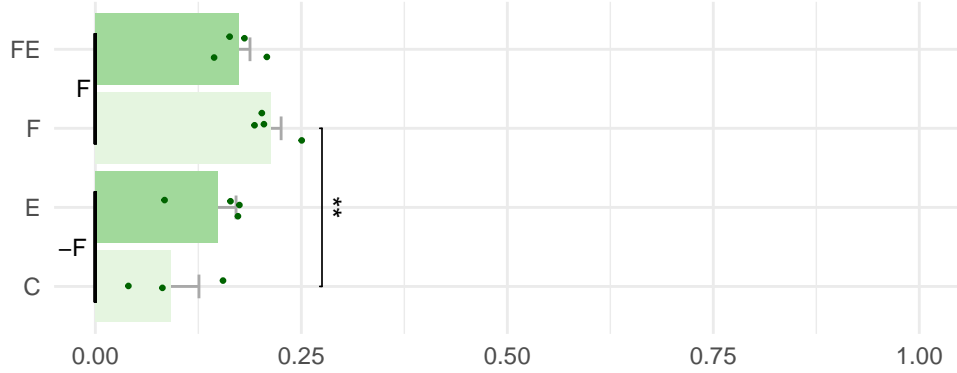

18:3 n-3 (Exrc\*,Fstg\*\*)

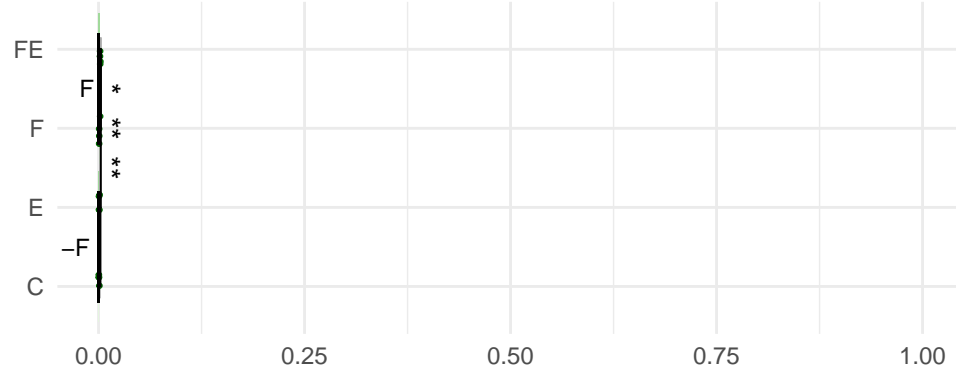

14:0 (Exrc\*,Fstg\*\*\*\*,Fstg-Exrc\*\*\*)

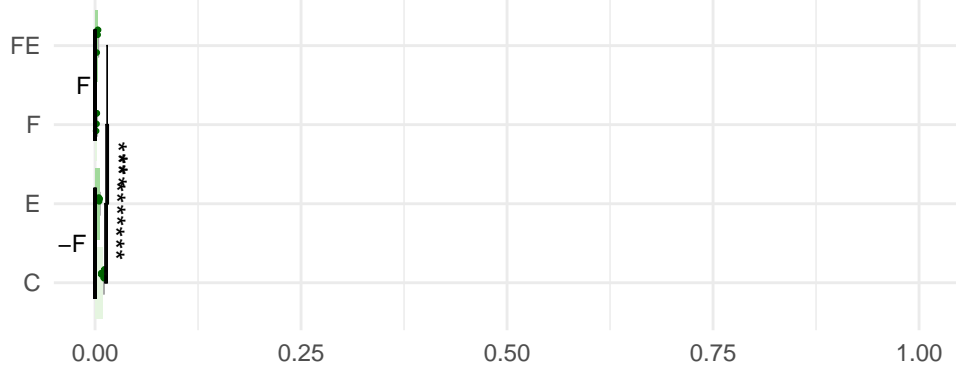

20:3 n-6

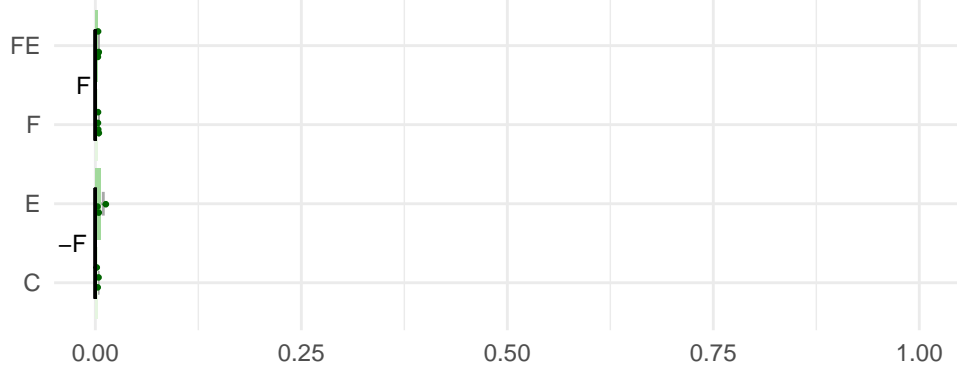

22:6 n-3

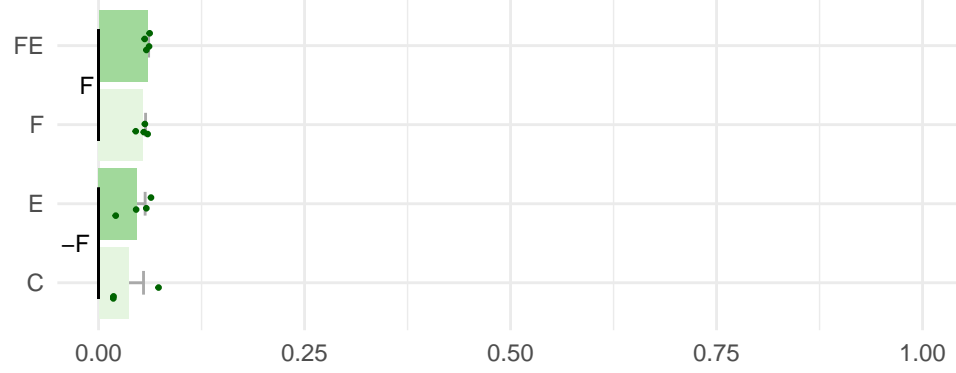

16:0 (Exrc\*,Fstg\*\*\*,Fstg-Exrc\*)

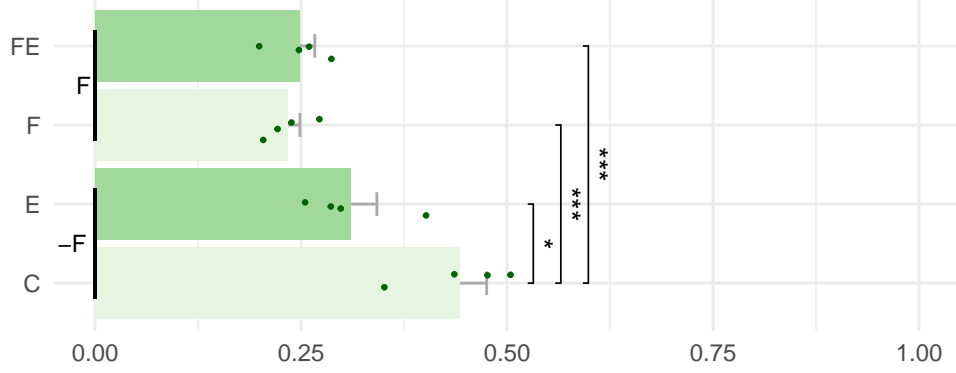

22:5 n-6 (Fstg\*)

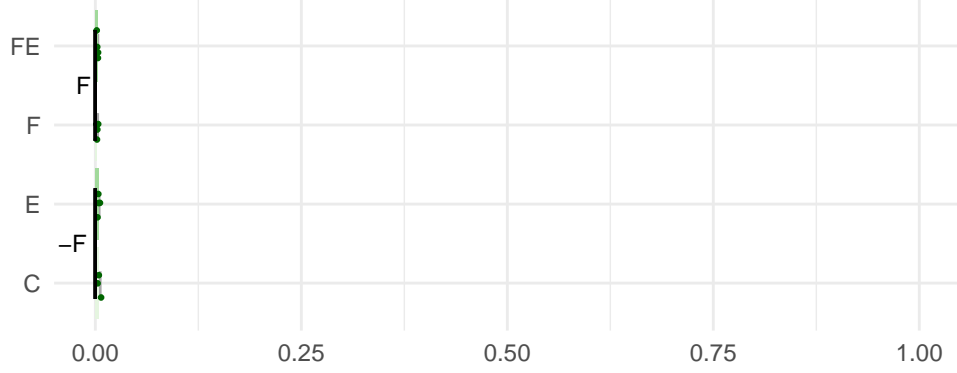

22:5 n-3

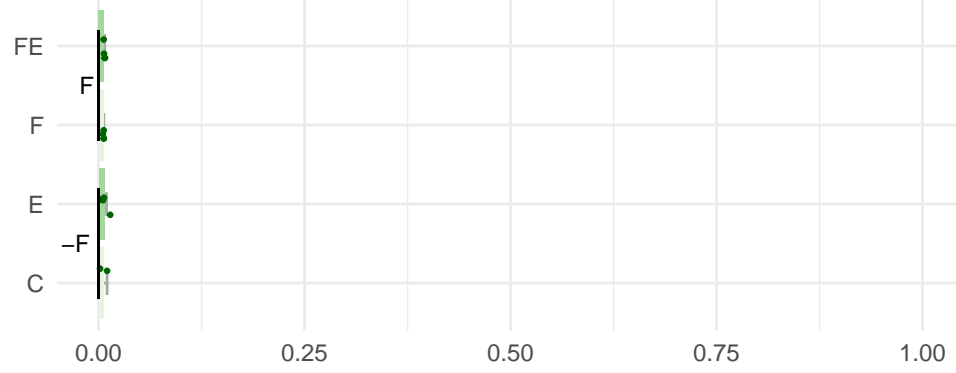

18:0 (Fstg<sup>\*\*\*</sup>)

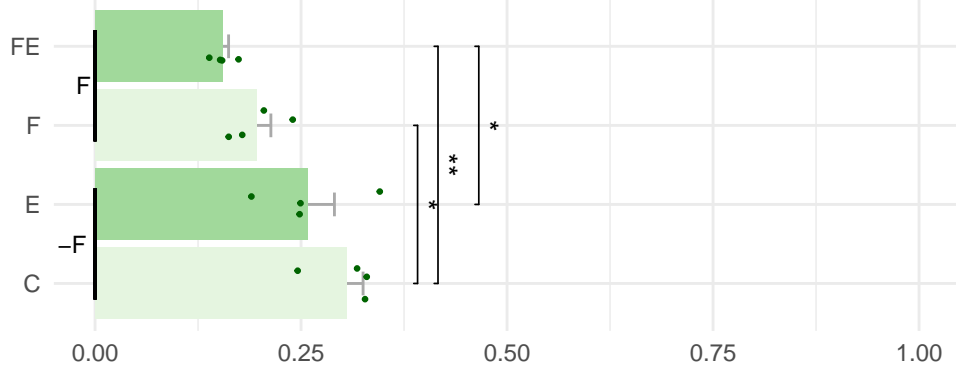

22:4 n-6 (Fstg\*)

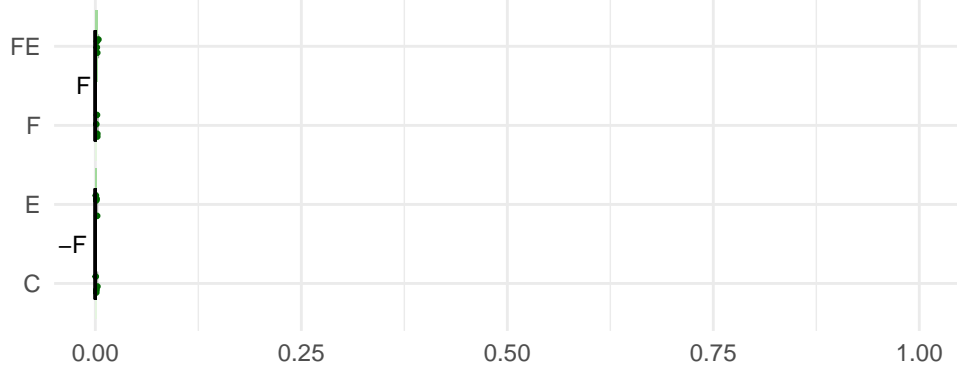

20:5 n-3

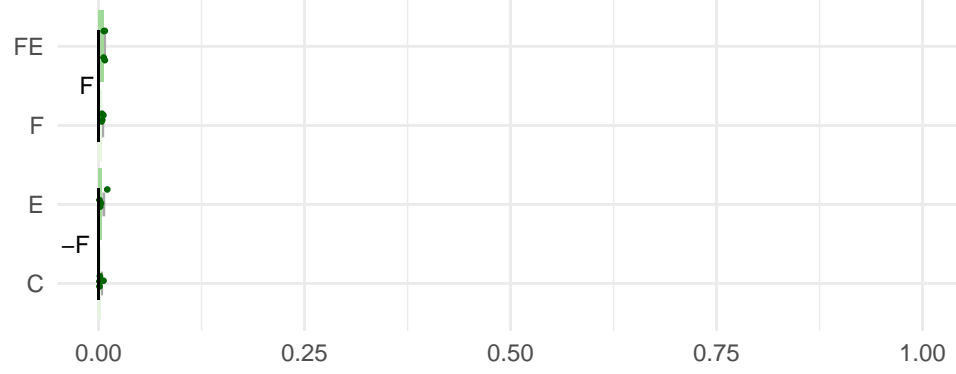

20:1 n-9 (Exrc\*,Fstg\*\*,Fstg-Exrc\*)

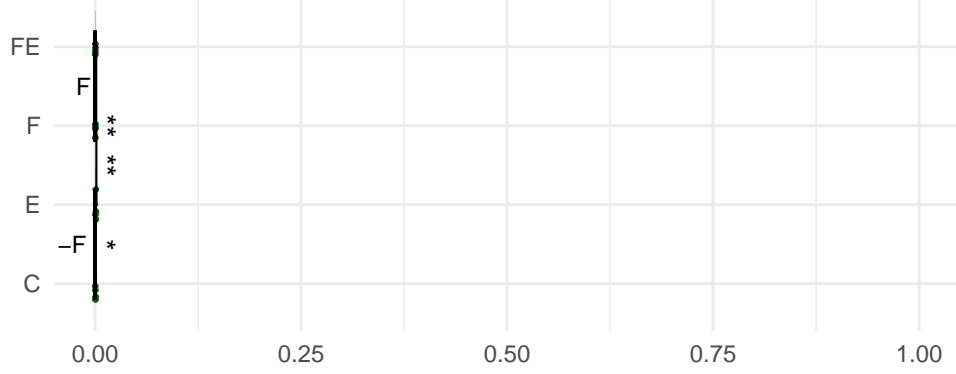

20:2 n-6 (Fstg\*\*\*\*)

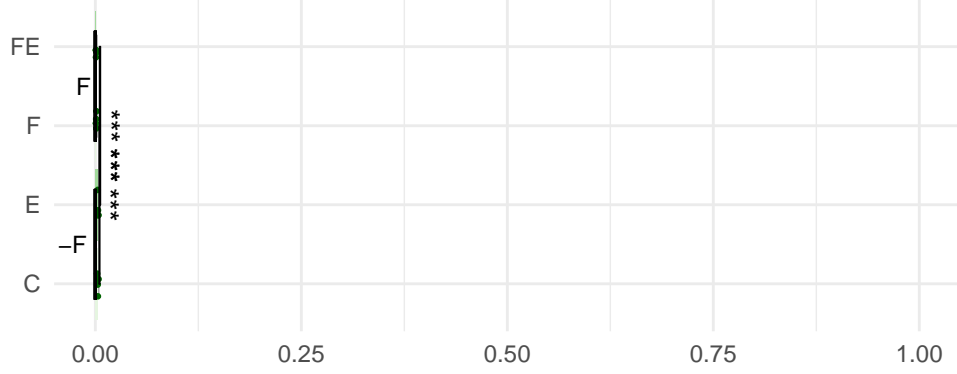

18:2 n-6t (Fstg\*\*)

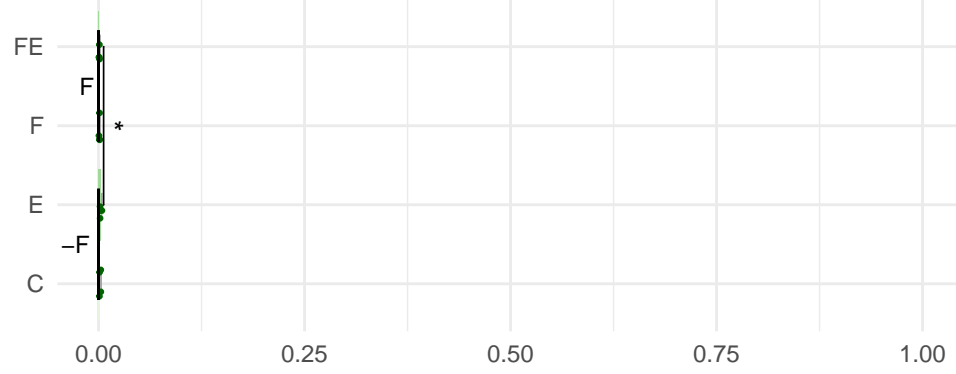

24:1 n-9 (Fstg\*\*)

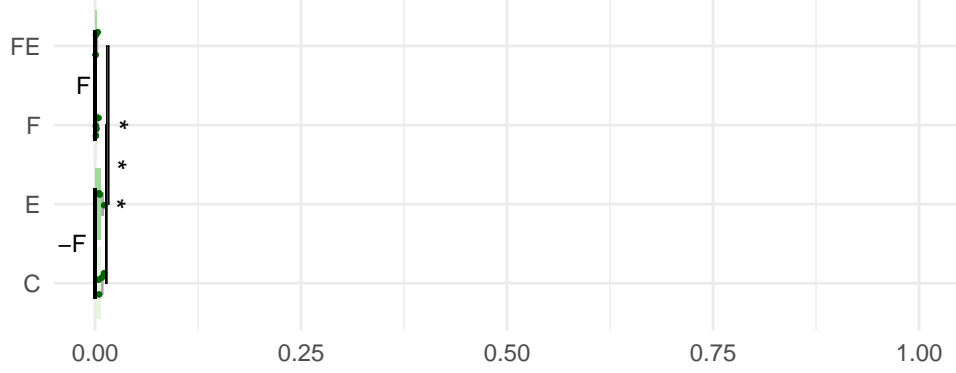

18:3 n-6 (Exrc\*\*,Fstg\*\*\*\*)

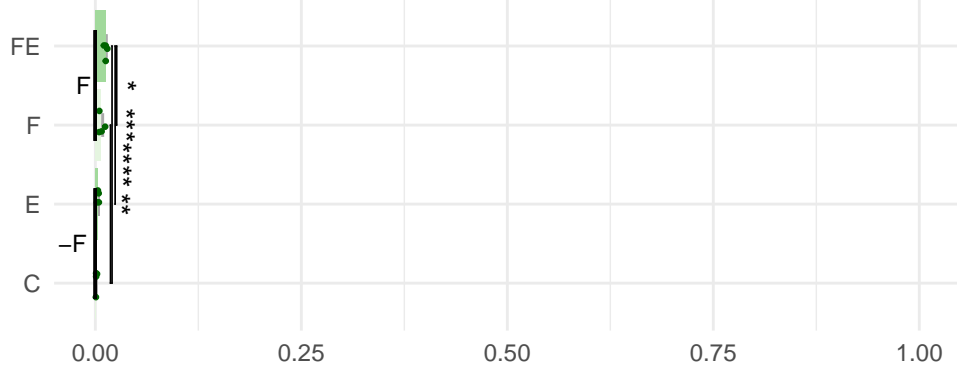

18:1t (Exrc\*,Fstg\*\*\*\*)

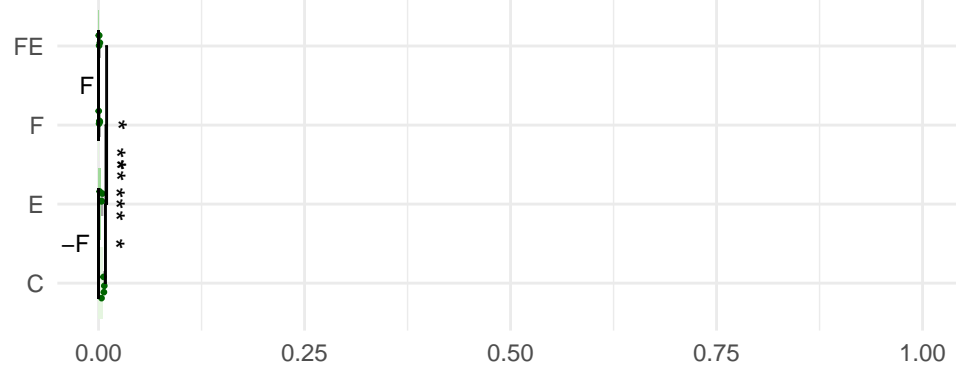

18:1 n-9 (Exrc\*,Fstg\*\*\*)

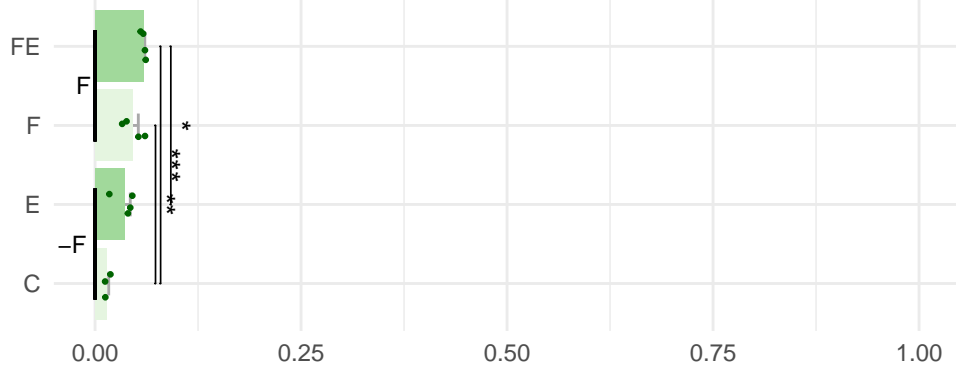

18:2 n-6 (Exrc\*,Fstg\*\*\*\*)

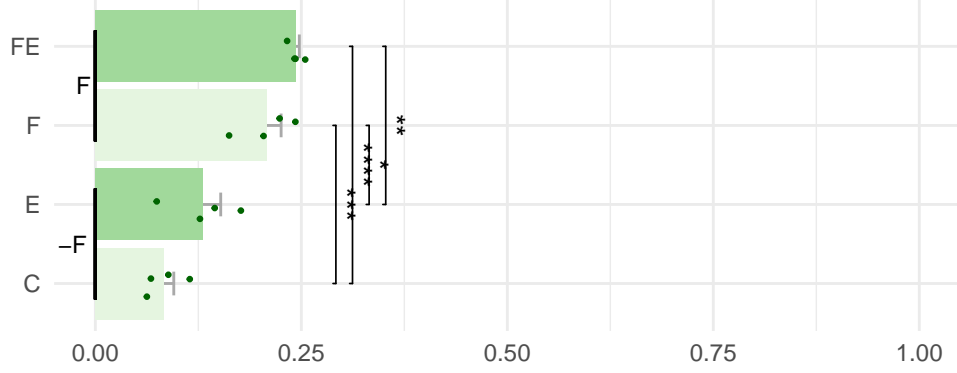

16:1 n-7t (Exrc\*,Fstg\*\*\*\*)

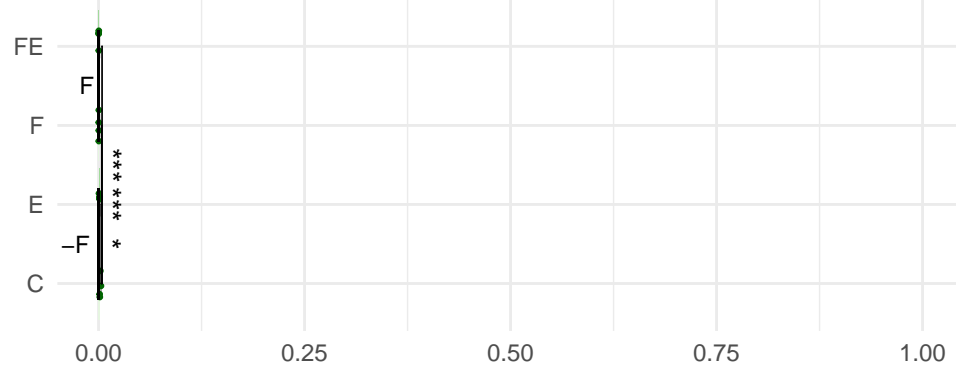

16:1 n-7

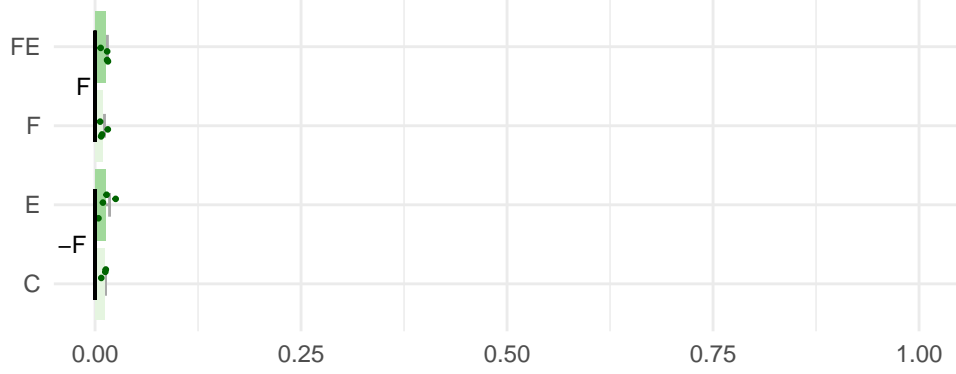

Supplement: s1 [file s1]
